# Supplementary material for: Placental exosomes isolated from urine of patients with gestational diabetes exhibit a differential profile expression of microRNAs across gestation
Source: PubMed Central journal article supplement — Int J Mol Med. 2020 Jun 3;46(2):546–60. doi: 10.3892/ijmm.2020.4626 (PMC7307810; doi:10.3892/ijmm.2020.4626), 2020-06-03
Supplement: Supplementary_Data.pdf [file Supplementary_Data.pdf]

Table SI. Diagnostic criteria for patients with GDM.

| Procedure                    | Glucose cut points <sup>a</sup> |       |        |
|------------------------------|---------------------------------|-------|--------|
|                              | Time (h)                        | mg/dl | mmol/l |
| 50 g                         | Fasting                         | ≥140  | 7.8    |
| 100 g, 3 h OGTT <sup>b</sup> | Fasting                         | ≥95   | 5.3    |
|                              | 1                               | ≥180  | 10.0   |
|                              | 2                               | ≥155  | 8.6    |
|                              | 3                               | ≥140  | 7.8    |
| 75 g, 2 h OGTT <sup>b</sup>  | Fasting                         | ≥92   | 5.1    |
|                              | 1                               | ≥180  | 10.0   |
|                              | 2                               | ≥153  | 8.4    |

<sup>a</sup>Venous serum or plasma glucose measured at the hospital laboratory; <sup>b</sup>two values meeting or exceeding the cut points are required for diagnosis.

Table SII. Gestational age at the time of sample collection.

| Sample collection time                                             | GDM (n=27) | Healthy (n=34) | P-value |
|--------------------------------------------------------------------|------------|----------------|---------|
| Duration of pregnancy at the time of the first evaluation (weeks)  | 15.1±3.7   | 15.1±3.0       | 0.97    |
| Duration of pregnancy at the time of the second evaluation (weeks) | 25.4±1.5   | 26.0±2.0       | 0.25    |
| Duration of pregnancy at the time of the third evaluation (weeks)  | 34.7±1.7   | 34.0±2.2       | 0.15    |

GDM, gestational diabetes mellitus.

Table SIII. Mature miRNA sequences (5'-3').

| MicroRNA        | Mature miRNA sequence                                                                                              | Cat. no. (Thermo Fisher Scientific, Inc.) |
|-----------------|--------------------------------------------------------------------------------------------------------------------|-------------------------------------------|
| hsa-miR-16-5p   | UAGCAGCACGUAAAUAUUGGCG                                                                                             | ID 000391                                 |
| hsa-miR-222-3p  | AGCUACAUCUGGCUACUGGGU                                                                                              | ID 002276                                 |
| hsa-miR-516-5p  | AUCUGGAGGUAAGAAGCACUUU                                                                                             | ID 001150                                 |
| hsa-miR-517-5p  | CCUCUAGAUGGAAGCACUGUCU                                                                                             | ID 001113                                 |
| hsa-miR-518a-5p | CUGCAAAGGGAAGCCCUUUC                                                                                               | ID 002396                                 |
| U6 snRNA        | GTGCTCGCTTCGGCAGCACATATACTAAAATTGG<br>AACGATACAGAGAAGATTAGCATGGCCCCTGCGC<br>AAGGATGACACGCAAATTCGTGAAGCGTTCCATATTTT | ID 001973                                 |

Table SIV. Reverse transcription (TaqMan) parameters (reaction volume, 15  $\mu$ l RNA).

| Step | Time     | Temperature |
|------|----------|-------------|
| Hold | 10 min   | 4°C         |
| Hold | 30 min   | 16°C        |
| Hold | 30 min   | 42°C        |
| Hold | 5 min    | 85°C        |
| Hold | $\infty$ | 4°C         |

Table SV. Thermal cycling parameters (reaction volume, 10  $\mu$ l cDNA).

| Step | Process                                           | Time             | Temperature  |
|------|---------------------------------------------------|------------------|--------------|
| 1    | Hold                                              | 10 min           | 95°C         |
| 2    | Hold                                              | 15 sec           | 95°C         |
| 3    | Cycle (45 cycles) denature<br>annealing/extension | 15 sec<br>60 sec | 95°C<br>60°C |
| 4    | End                                               | $\infty$         | 4°C          |

Table SVI. Analysis of signaling pathways related to the study of microRNAs determined in the Kyoto Encyclopedia of Genes and Genomes bioinformatics tool (KEGG).

| KEGG signaling pathways                                      | P-value  | No. of genes | No. of microRNAs involved |
|--------------------------------------------------------------|----------|--------------|---------------------------|
| Biosynthesis of fatty acids                                  | <0.00001 | 2            | 1                         |
| MAPK signaling path                                          | <0.00001 | 40           | 3                         |
| p53 signaling path                                           | <0.00001 | 18           | 3                         |
| Prostate cancer                                              | <0.00001 | 14           | 1                         |
| Pathway in cancer                                            | <0.00001 | 49           | 3                         |
| PI3K/Akt signaling path                                      | <0.00001 | 30           | 1                         |
| Wnt signaling path                                           | <0.00001 | 29           | 2                         |
| Melanoma                                                     | <0.00001 | 12           | 1                         |
| Ubiquitination-mediated proteolysis                          | 0.00012  | 24           | 2                         |
| Hepatitis B                                                  | 0.00012  | 20           | 2                         |
| Endocytosis                                                  | 0.00014  | 29           | 3                         |
| Focal adhesion                                               | 0.00018  | 30           | 3                         |
| Nucleotide excision repair                                   | 0.00036  | 2            | 1                         |
| Biosynthesis of glycosaminoglycans - heparan sulfate/heparin | 0.001    | 5            | 3                         |
| Processing of proteins in the endoplasmic reticulum          | 0.002    | 15           | 2                         |
| Colorectal cancer                                            | 0.003    | 12           | 2                         |
| Cellular cycle                                               | 0.003    | 15           | 2                         |
| Insulin signaling pathway                                    | 0.004    | 16           | 1                         |
| Neurotrophin signaling pathway                               | 0.004    | 19           | 2                         |
| Long term depression                                         | 0.007    | 9            | 1                         |
| Hematopoietic cell lineage                                   | 0.009    | 3            | 1                         |
| Pancreatic cancer                                            | 0.011    | 10           | 1                         |
| Endometrial cancer                                           | 0.011    | 11           | 2                         |
| mTOR signaling path                                          | 0.016    | 9            | 1                         |
| Gap junction                                                 | 0.023    | 5            | 1                         |
| Glioma                                                       | 0.025    | 9            | 1                         |
| Ovocitary meiosis                                            | 0.036    | 12           | 1                         |
| Hypertrophic cardiomyopathy (HCM)                            | 0.036    | 5            | 2                         |
| AML                                                          | 0.039    | 8            | 1                         |
| HTLV-I infection                                             | 0.041    | 19           | 1                         |
| Dilated cardiomyopathy                                       | 0.051    | 5            | 2                         |
| Protein export                                               | 0.061    | 3            | 1                         |
| Viral carcinogenesis                                         | 0.069    | 17           | 2                         |
| HIF-1 signaling path                                         | 0.070    | 11           | 1                         |
| Chronic myeloid leukemia                                     | 0.073    | 9            | 1                         |
| Progesterone-mediated oocyte maturation                      | 0.078    | 10           | 1                         |
| Shigellosis                                                  | 0.081    | 7            | 1                         |
| TGF- $\beta$ signaling path                                  | 0.088    | 9            | 1                         |
| Phosphatidylinositol signaling system                        | 0.092    | 6            | 1                         |
| Pancreatic secretion                                         | 0.15     | 8            | 1                         |
| Inositol phosphate metabolism                                | 0.15     | 5            | 1                         |
| Renal cell carcinoma                                         | 0.15     | 7            | 1                         |
| Dopaminergic synapse                                         | 0.17     | 8            | 1                         |
| VEGF signaling path                                          | 0.17     | 7            | 1                         |
| Cytokine-cytokine receptor interaction                       | 0.19     | 5            | 1                         |
| Lysine degradation                                           | 0.21     | 3            | 1                         |
| Biosynthesis of valine, leucine and isoleucine               | 0.23     | 1            | 1                         |
| Glutamnergic synapse                                         | 0.26     | 4            | 1                         |
| Basal transcription factors                                  | 0.27     | 1            | 1                         |
| Type II diabetes mellitus                                    | 0.31     | 6            | 1                         |
| B cell receptor signaling pathway                            | 0.31     | 7            | 1                         |
| Actin cytoskeleton regulation                                | 0.32     | 1            | 1                         |
| T cell receptor signaling pathway                            | 0.32     | 9            | 1                         |
| Metabolism of fatty acids                                    | 0.37     | 1            | 1                         |
| Galactose metabolism                                         | 0.38     | 3            | 1                         |
| Other types of O-glycan biosynthesis                         | 0.38     | 2            | 1                         |

Table SVI. Continued.

| KEGG signaling pathways                              | P-value | No. of genes | No. of microRNAs involved |
|------------------------------------------------------|---------|--------------|---------------------------|
| Biosynthesis of glycosaminoglycans - keratan sulfate | 0.42    | 1            | 1                         |
| Glutathione metabolism                               | 0.48    | 1            | 1                         |
| Diabetes in young individuals                        | 0.54    | 2            | 1                         |
| RNA transport                                        | 0.68    | 5            | 1                         |
